# Supplementary material for: FBXO31 is upregulated by METTL3 to promote pancreatic cancer progression via regulating SIRT2 ubiquitination and degradation
Source: Springer Nature journal article supplement (doi:10.1038/s41419-024-06425-y), 2024-01-12
Supplement: MOESM3 [file 41419_2024_6425_MOESM3_ESM.pdf]

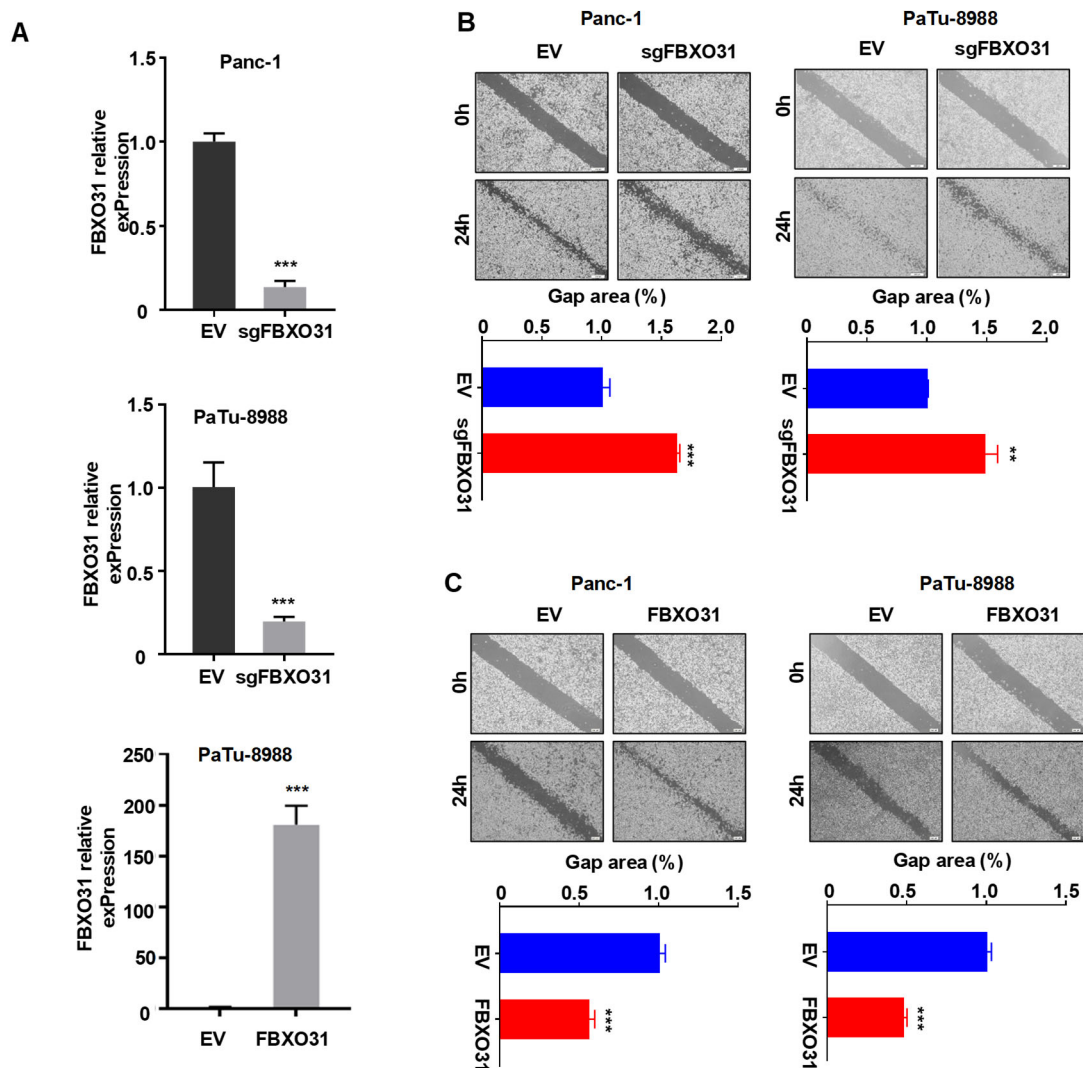

**Figure S1. FBXO31 promotes cell migration.**

A: qRT-PCR analysis to detect FBXO31 mRNA levels after FBXO31 depletion in Panc-1 and PaTu-8988 cells. qRT-PCR analysis to detect FBXO31 mRNA levels after FBXO31 overexpression in PaTu-8988 cells. \*\*\* $p < 0.001$  compared to control.

B: Wound healing assays to analyze cell migration capacity of Panc-1 and PaTu-8988 cells transfected with FBXO31 sgRNAs. \*\* $p < 0.01$ , \*\*\* $p < 0.001$  compared to control.

C: Wound healing assays to analyze cell migration capacity of Panc-1 and PaTu-8988 cells transfected with FBXO31 constructs. \*\*\* $p < 0.001$  compared to control.

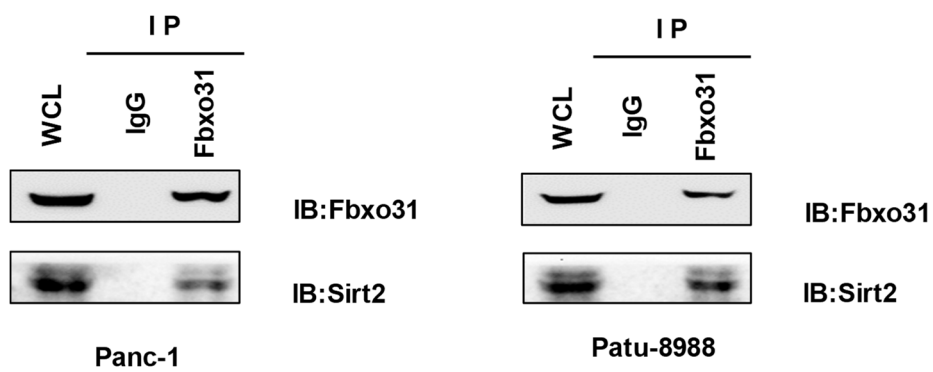

**Figure S2. FBXO31 inhibited Sirt2 expression via interacting with Sirt2.**

IB analysis of immunoprecipitates (IPs) and WCLs derived from Panc-1 cells and Patu-8988 cells. Cells were treated with 10  $\mu$ M MG132 for 6 hours before harvesting.

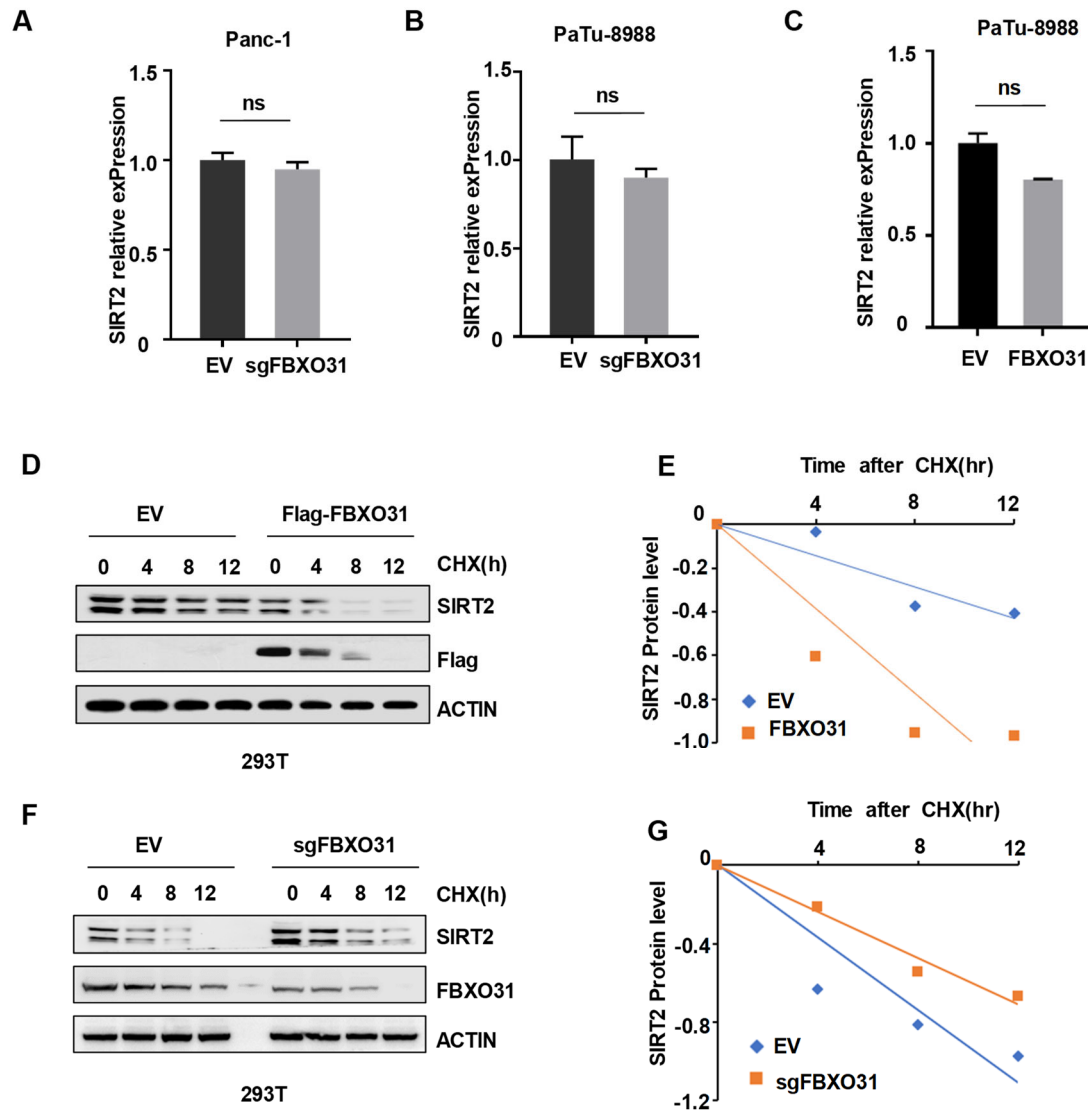

**Figure S3. FBXO31 promotes the half-life of SIRT2.**

A-B: qRT-PCR analysis to detect SIRT2 mRNA levels after FBXO31 depletion in Panc-1 (A) and PaTu-8988 (B) cells. \*\*\* $p < 0.001$  compared to control.

C: qRT-PCR analysis to detect FBXO31 and SIRT2 mRNA levels after FBXO31-overexpressing in PaTu-8988(B) cells. \*\*\* $p < 0.001$  compared to control.

D: IB analysis of WCLs derived from 293T cells transfected with FBXO31 constructs. Where indicated, 100  $\mu$ g/ml cycloheximide (CHX) was added and cells were harvested at indicated time points.

E: SIRT2 protein abundance in (D) was quantified and plotted.

F: IB analysis of WCLs derived from 293T cells transfected with FBXO31 sgRNA. Where indicated, 100  $\mu$ g/ml cycloheximide (CHX) was added and cells were harvested and lysed at indicated time points.

G: SIRT2 protein abundance in (F) was quantified and plotted.

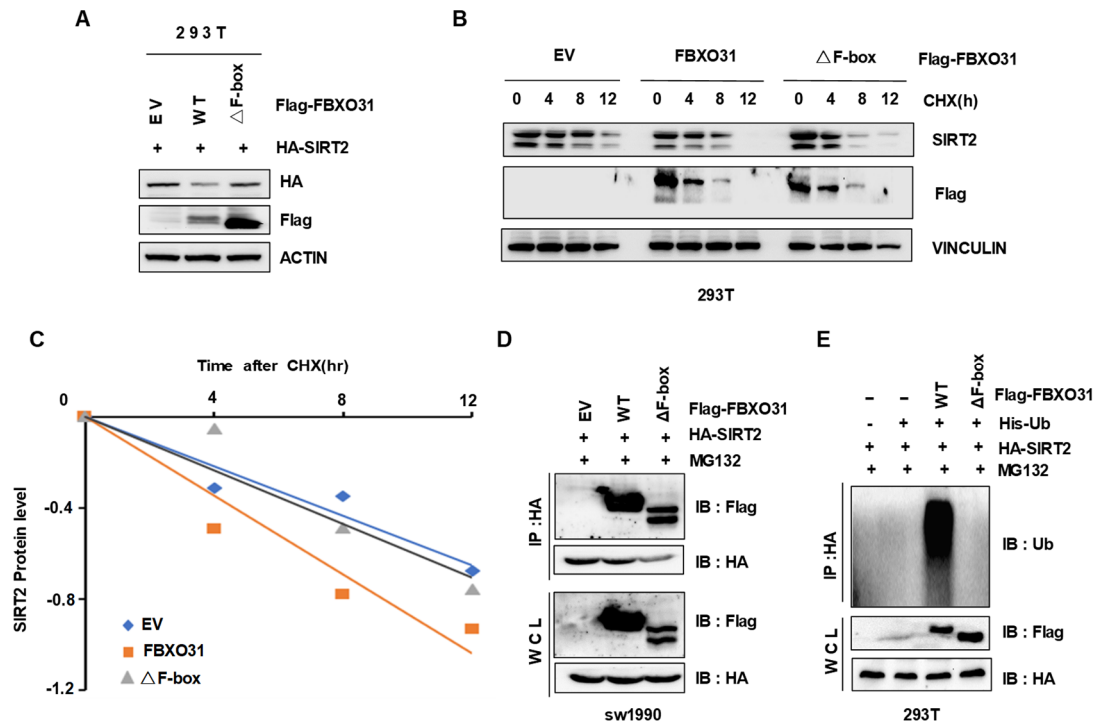

**Figure S4. FBXO31-mediated destruction of SIRT2 is dependent on the F-box motif of FBXO31.**

A: IB analysis of SIRT2 expression after transfection of FBXO31-WT and FBXO31-F-box plasmids in 293T cells.

B: IB analysis of WCLs derived from 293T cells transfected with FBXO31-WT or FBXO31-ΔF-box constructs. Where indicated, 100μg/ml cycloheximide (CHX) was added and cells were harvested and lysed at indicated time points.

C: SIRT2 protein abundance in (B) was quantified and plotted.

D: IB analysis of IPs and WCLs derived from sw1990 cells transfected with the FBXO31-WT and FBXO31-ΔF-box plasmids.

Cells were treated with 10 μM MG132 for 6 h before harvesting.

E: IB analysis of ubiquitination products and WCLs derived from 293T cells transfected with the FBXO31-WT and FBXO31-ΔF-box plasmids. Cells were treated with 10 μM MG132 for 6 h before harvesting.

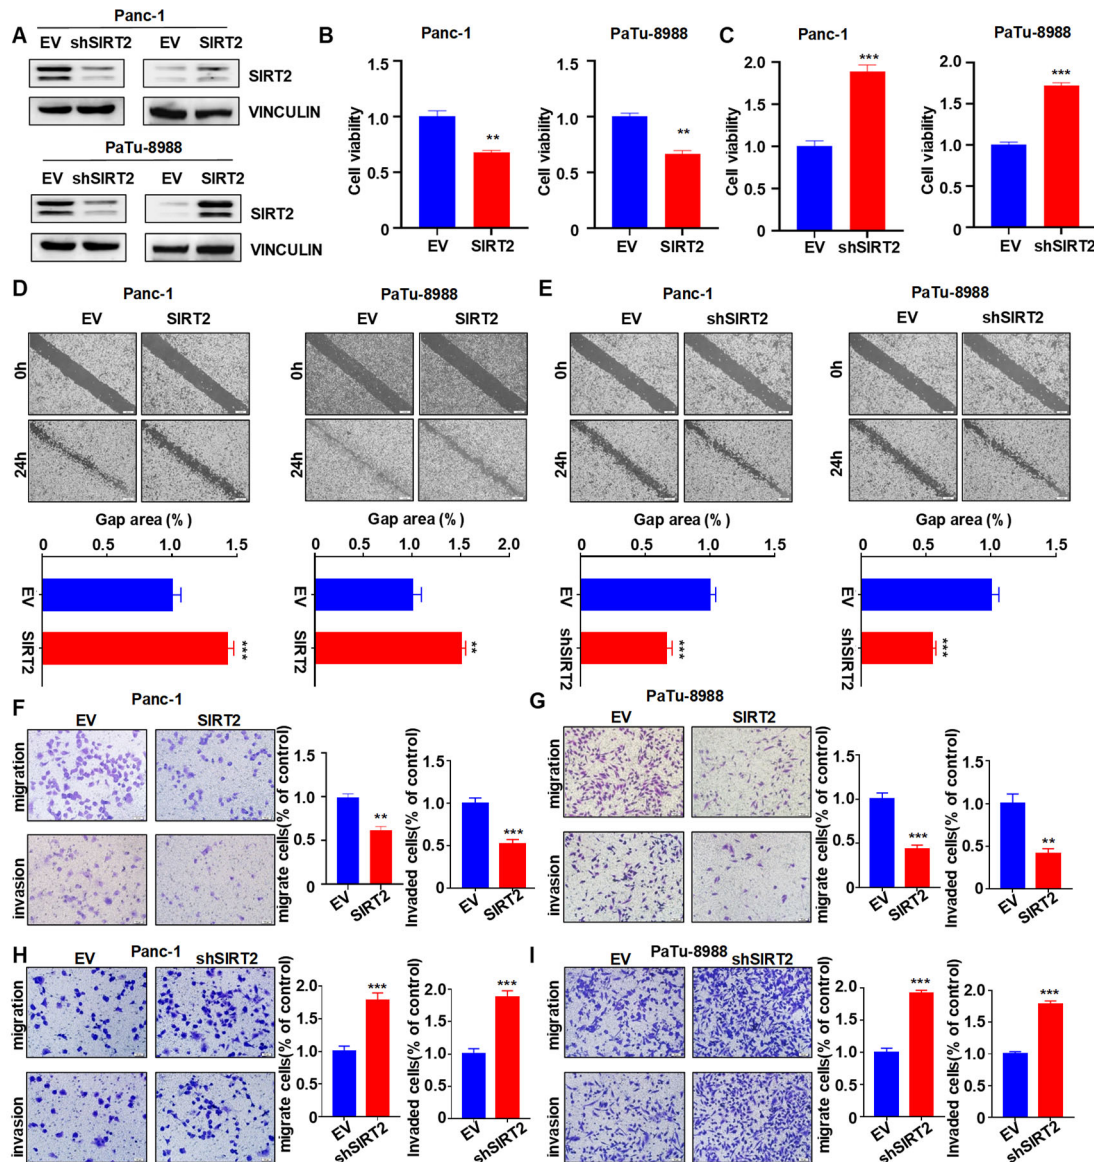

**Figure S5: SIRT2 inhibits cell viability, migration and invasion in PC cells.**

A: IB analysis of WCLs derived from the Panc-1 and PaTu-8988 cells transfected with the indicated plasmids.

B-C : MTT assays to detect cell proliferation in Panc-1 and PaTu-8988 cells transfected with SIRT2 shRNAs or SIRT2 constructs. \*\* $p < 0.01$  compared to control, \*\*\* $p < 0.001$  compared to control.

D-E: Wound healing assays to analyze cell migration capacity of Panc-1 and PaTu-8988 cells transfected with SIRT2 shRNAs or SIRT2 constructs. \*\* $p < 0.01$  compared to control, \*\*\* $p < 0.001$  compared to control.

F-I: Transwell assays to analyze cell migration and invasion capacity of Panc-1 and PaTu-8988 cells transfected with SIRT2 shRNAs or SIRT2 constructs. \*\* $p < 0.01$  compared to control, \*\*\* $p < 0.001$  compared to control.

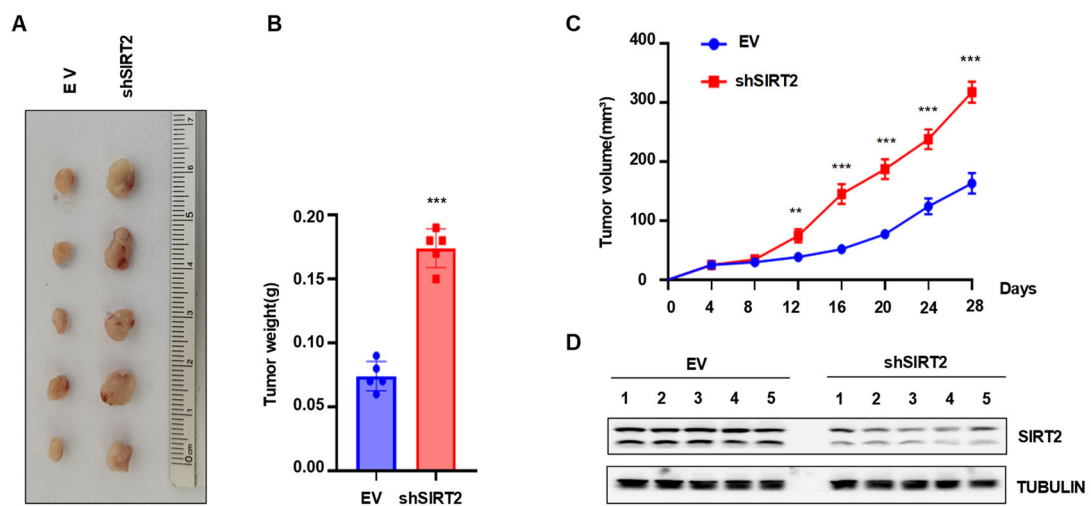

**Figure S6: Depletion of SIRT2 promotes tumor growth in mice.**

A: Pictures of tumor masses dissected from SIRT2-knockdown xenograft mouse models. Panc-1 cells with stable SIRT2-knockdown and the control cells were injected subcutaneously into the BALB/c-nu/nu mice to establish xenograft mouse models.

B-C: Tumor weights and tumor volumes of dissected tumor mass in (A).

D: IB analysis of the SIRT2 protein levels in the dissected tumors.

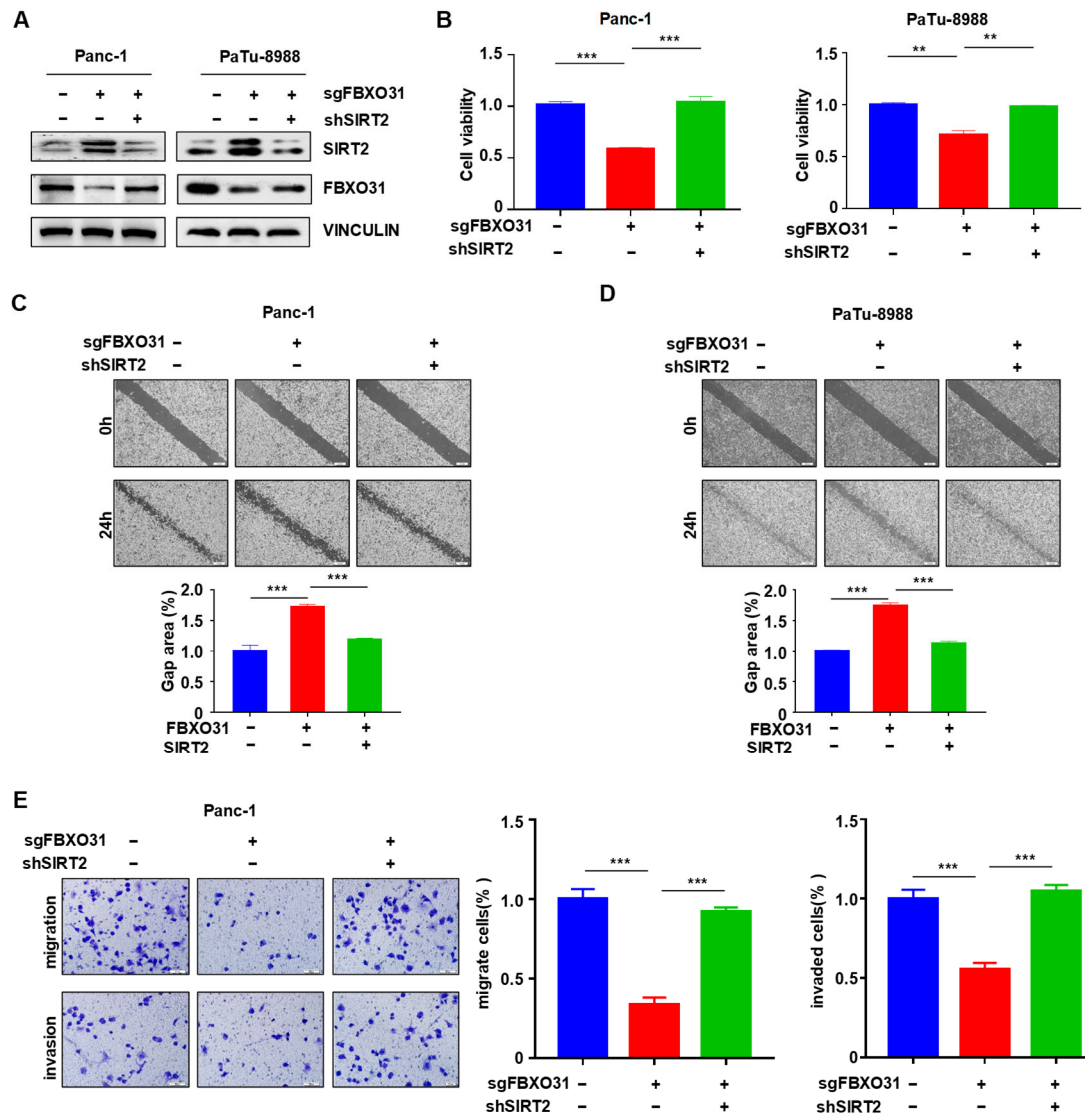

**Figure S7: SIRT2 is required for FBXO31-mediated promotion effect of cell viability, migration and invasion in PC.**

A: IB analysis of WCLs derived from Panc-1 and PaTu-8988 cells transfected with the indicated plasmids.

B: MTT assays to detect cell proliferation in Panc-1 and PaTu-8988 cells transfected with the indicated plasmids. \*\* $p < 0.01$  compared to control, \*\*\* $p < 0.001$  compared to control.

C-D: Wound healing assays to analyze cell migration capacity of Panc-1 and PaTu-8988 cells transfected with the indicated plasmids. \*\*\* $p < 0.001$  compared to control.

E: Transwell assays to analyze cell migration and invasion capacity of Panc-1 and PaTu-8988 cells transfected with the indicated plasmids. \*\*\* $p < 0.001$  compared to control.



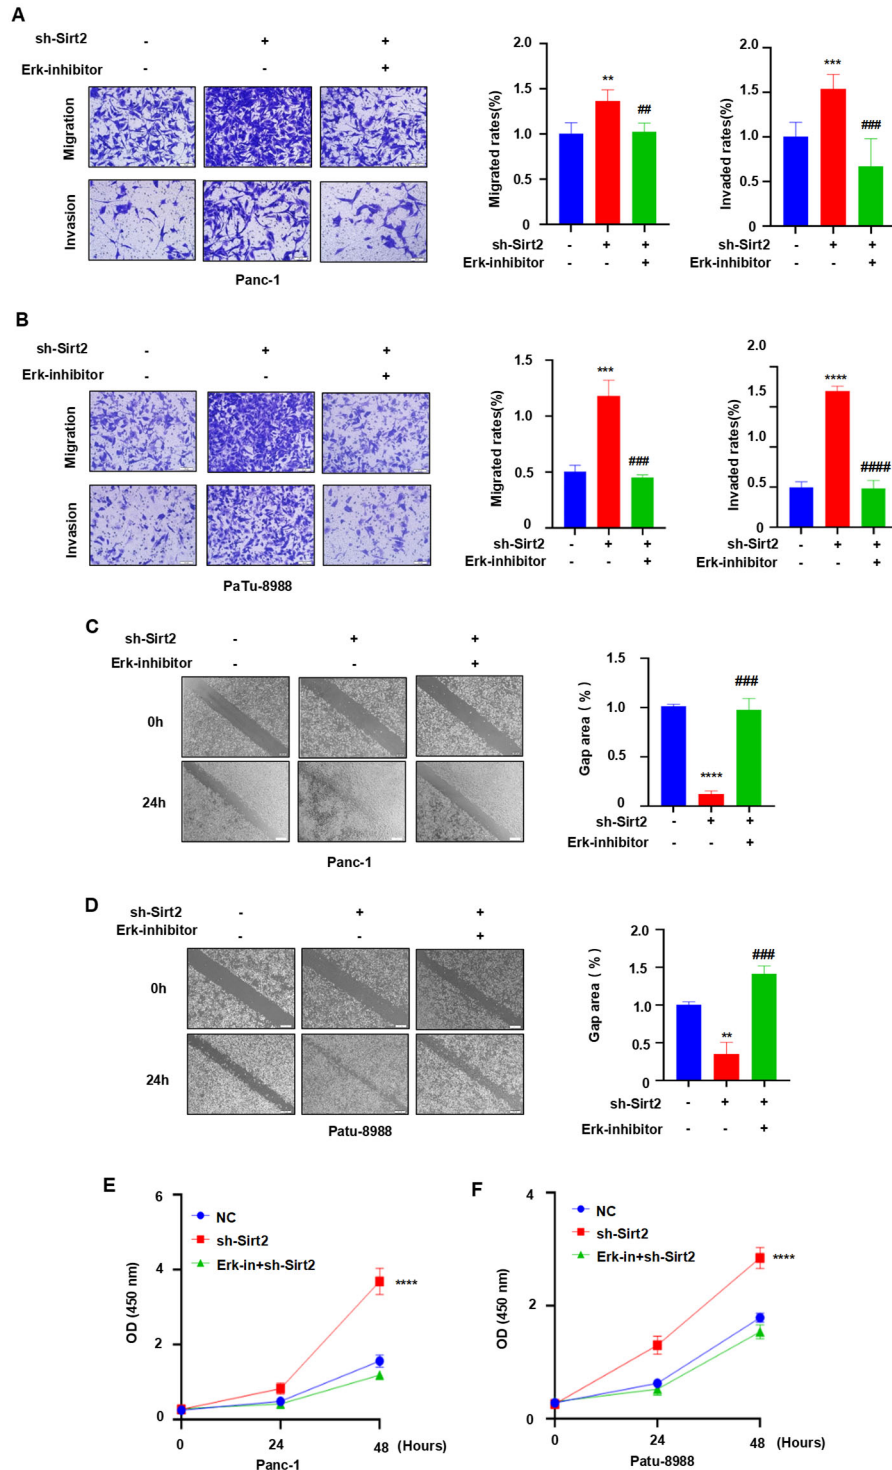

**Figure S8: SIRT2 performed its functions in part via the ERK pathway.**

A-B: Transwell assays to analyze cell migration and invasion capacity of Panc-1 and PaTu-8988 cells treated with sh-SIRT2 and Erk inhibitor.

C-D: Wound healing assay to analyze cell migration of Panc-1 and PaTu-8988 cells treated with sh-SIRT2 and Erk inhibitor.

E-F: CCK-8 assay to analyze cell viability of Panc-1 and PaTu-8988 cells treated with sh-SIRT2 and Erk inhibitor. \*\* $p < 0.01$ , \*\*\* $p < 0.001$ , \*\*\*\* $p < 0.0001$  compared to control. ## $p < 0.01$ , ### $p < 0.001$  compared to sh-Sirt2.



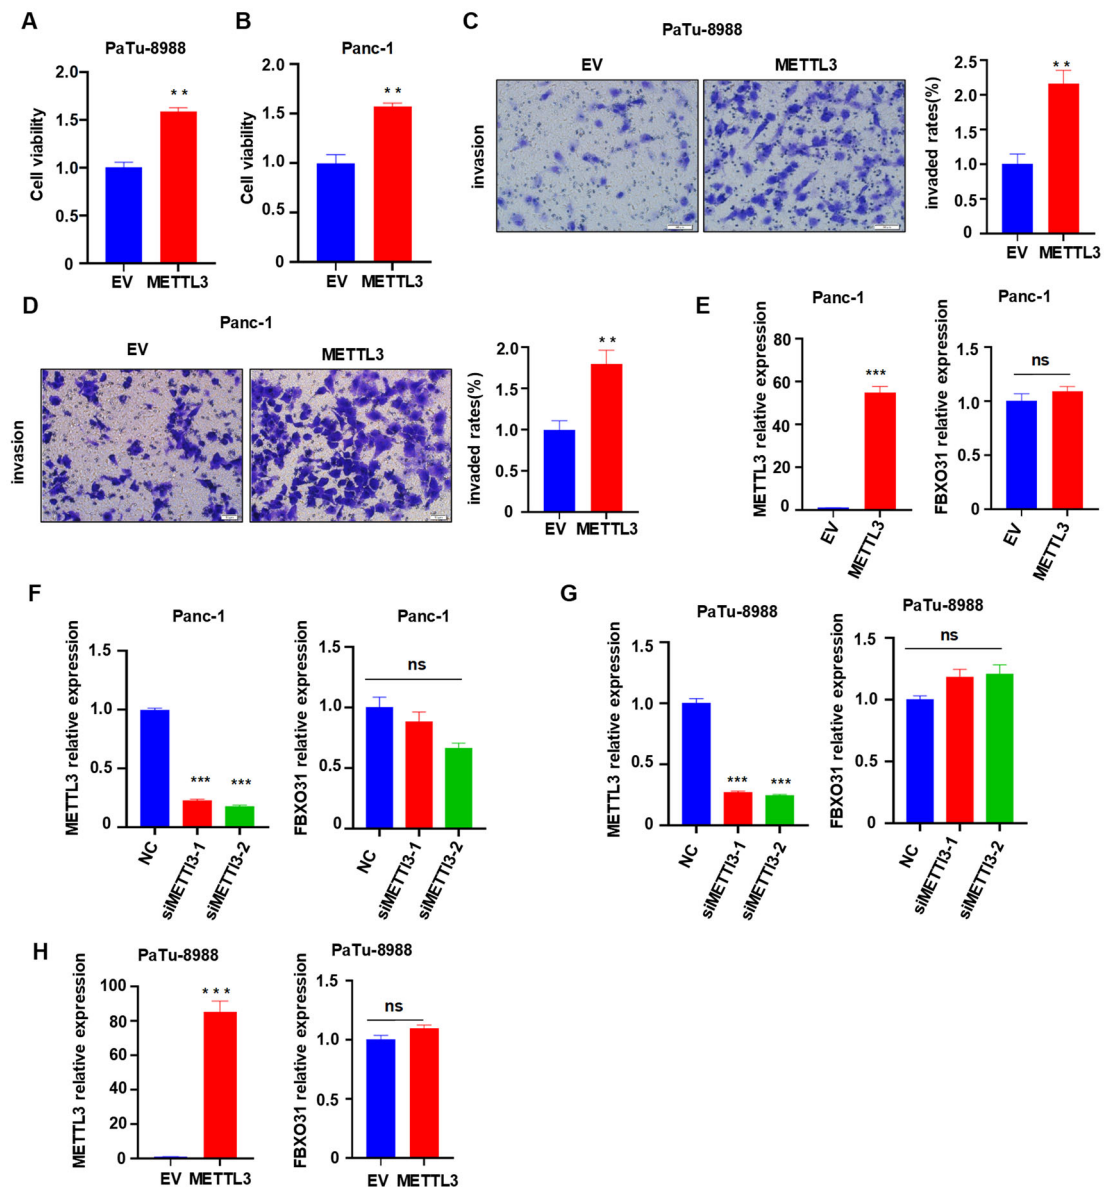

**Figure S9: METTL3 promotes cell viability and invasion in PC.**

A-B: MTT assays to detect cell proliferation in Panc-1 and PaTu-8988 cells transfected with METTL3 constructs. \*\* $p < 0.01$  compared to control.

C-D: Transwell assays to analyze cell migration and invasion capacity of Panc-1 and PaTu-8988 cells transfected with METTL3 constructs. \*\* $p < 0.01$  compared to control.

E-F: qRT-PCR analysis to detect METTL3 and FBXO31 mRNA levels after METTL3 overexpressing (E) or depletion (F) in Panc-1 cells. \*\*\* $p < 0.001$  compared to control.

G-H: qRT-PCR analysis to detect METTL3 and FBXO31 mRNA levels after METTL3 overexpressing (G) or depletion (H) in PaTu-8988 cells. \*\*\* $p < 0.001$  compared to control.

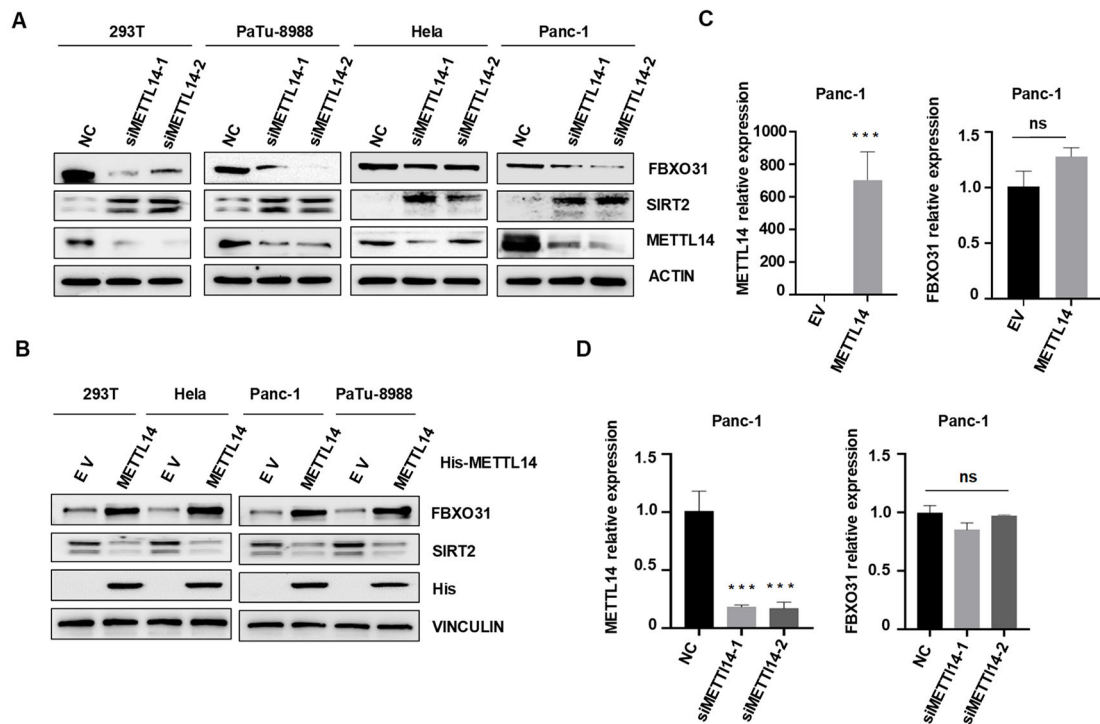

**Figure S10: METTL14 affects the expression of FBXO31 and SIRT2 in PC cells.**  
A-B: IB analysis of WCLs derived from Panc-1, PaTu-8988, HeLa and 293T cells transfected with the indicated plasmids.  
C-D: qRT-PCR analysis to detect METTL14 and FBXO31 mRNA levels after METTL14 overexpressing (C) or depletion (D) in Panc-1 cells. \*\*\* $p < 0.001$  compared to control.
